# Supplementary material for: Phytochemical Profile, α-Glucosidase, and α-Amylase Inhibition Potential and Toxicity Evaluation of Extracts from Citrus aurantium (L) Peel, a Valuable By-Product from Northeastern Morocco
Source: MDPI journal article supplement (doi:10.3390/biom11111555), 2021-10-20
Supplement: s1 [file s1]

**Phytochemical Profile, Inhibition Potential Toward  $\alpha$ -Glucosidase and  $\alpha$ -Amylase Activities and Toxicity Evaluation of Peel Extracts of *Citrus aurantium* (L) from Northeastern Morocco**

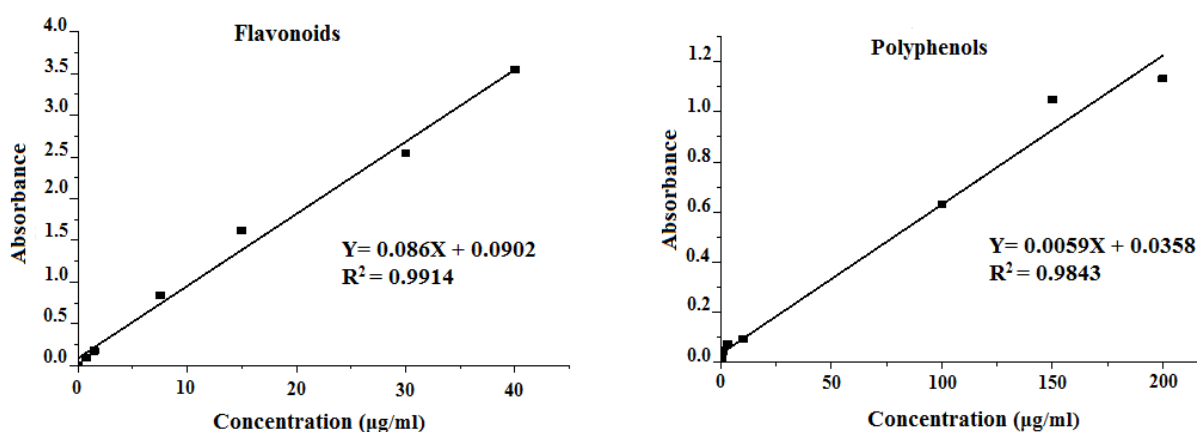

**Figure S1:** Quercetin (Flavonoids) and Gallic acid (Polyphenols) calibration curves

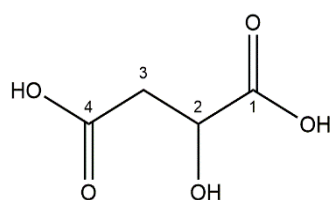

Malic acid

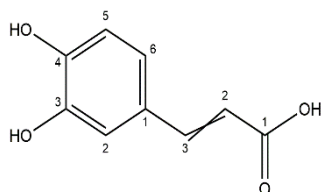

Caffeic acid

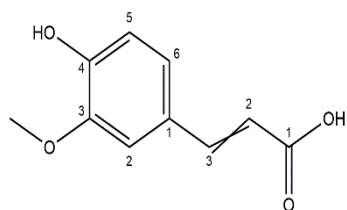

Ferulic acid

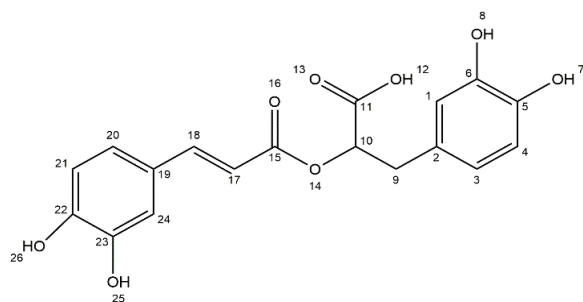

Rosmarinic acid

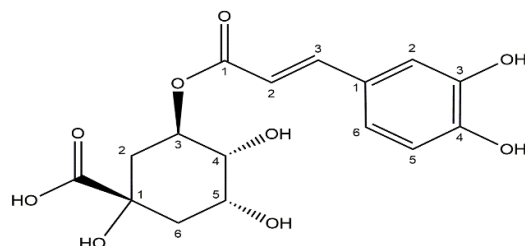

Chlorogenic acid

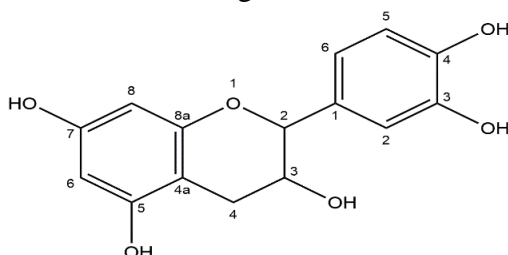

Catechin

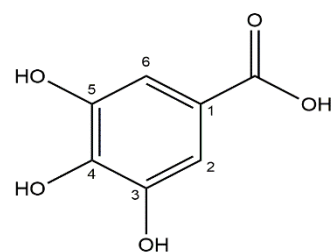

Gallic acid

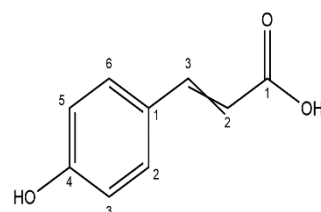

Coumaric acid

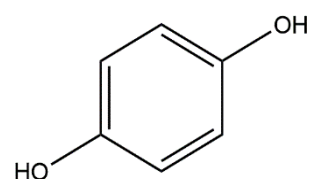

Hydroquinone

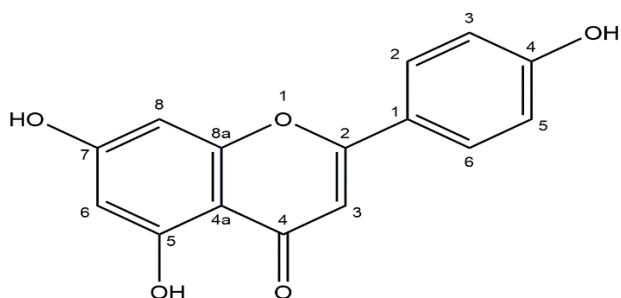

Apigenin

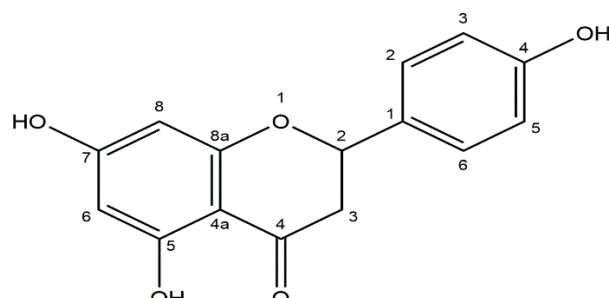

Naringenin

**Figure S2:** Chemical structures of the molecules identified in *C. aurantium* L peel extracts: chloroform extract (CFE), acetone extract (ACE) and hydro-alcoholic extract (EWE).

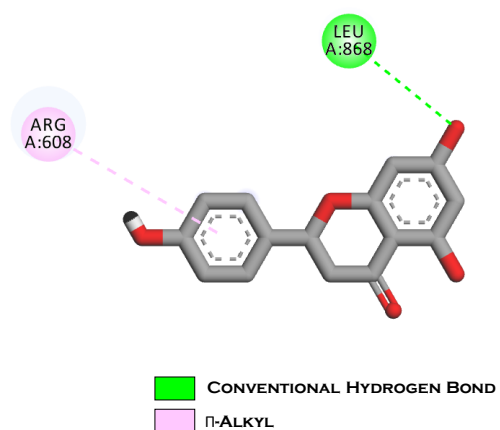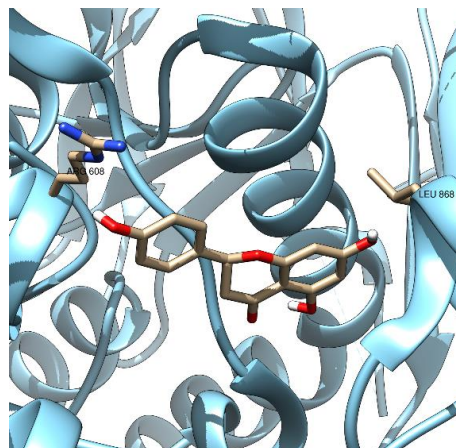

| COMPOUNDS  | BINDING SCORE<br>(KCAL/MOL) | INTERACTING RESIDUES | INTERACTION TYPE        |
|------------|-----------------------------|----------------------|-------------------------|
| Naringenin | -7.2                        | ARG 608, LEU 868     | H-bonding, $\pi$ -Alkyl |

**Figure S3:** Molecular Docking of Naringenin on human  $\alpha$ -glucosidase active site.

**Table S1:** The chemical constituents of the essential oil *C. aurantium* L. peel

| Peak Number | Retention time (min) | Peak Area (%) | Molecules Name      | Molecules structure                                                                   |
|-------------|----------------------|---------------|---------------------|---------------------------------------------------------------------------------------|
| 1           | 7.625                | 3.126         | $\alpha$ -Pinene    | 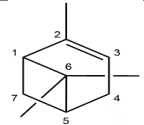   |
| 2           | 8.725                | 3.729         | $\beta$ -Pinene     |    |
| 3           | 9.083                | 17.614        | $\beta$ -Myrcene    |    |
| 4           | 9.367                | 1.612         | Caprylaldehyde      |    |
| 5           | 9.942                | 35.173        | D-Limonene          |   |
| 6           | 10.358               | 4.154         | $\beta$ -Ocimene    |  |
| 7           | 10.875               | 2.518         | Linalool oxide      |  |
| 8           | 11.392               | 18.194        | $\beta$ -Linalool   |  |
| 9           | 13.092               | 3.478         | $\alpha$ -Terpineol |  |
| 10          | 13.283               | 1.493         | Decanal             |  |
| 11          | 13.675               | 0.948         | Nerol               |  |
| 12          | 14.092               | 5.260         | Linalyl Acetate     |  |
| 13          | 14.342               | 1.159         | Decanol             |  |

---

**14**

16.000

1.542

Geranyl Acetate

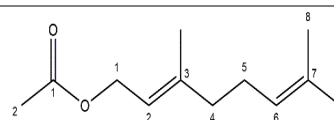

**Table S2:** Chemical composition of ethyl acetate extract from the peel of *C. aurantium* L.

| Peak Number | Retention time (min) | Peak Area (%) | Molecules Name | Molecules structure                                                                 |
|-------------|----------------------|---------------|----------------|-------------------------------------------------------------------------------------|
| 1           | 9.933                | 21.117        | D-Limonene     | 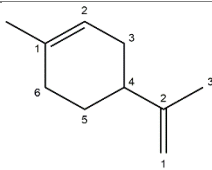 |
| 2           | 18.475               | 5.681         | Rimantadine    |   |
| 3           | 22.583               | 18.827        | Palmitic Acid  |   |
| 4           | 24.325               | 54.376        | Linoleic Acid  |   |

**Table S3:** The chemical composition of cyclohexane extract from the peel of *C. aurantium* L.

| Peak Number | Retention time (in) | Peak Area (%) | Names Molecules                      | Molecules structure                                                                  |
|-------------|---------------------|---------------|--------------------------------------|--------------------------------------------------------------------------------------|
| 1           | 9.933               | 36.154        | D-Limonene                           | 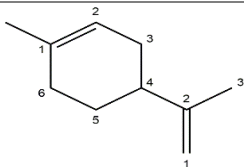   |
| 2           | 13.583              | 21.620        | 1,5-Heptadien-4-ol, 3,3,6-trimethyl- |    |
| 3           | 15.558              | 1.835         | $\alpha$ -Terpineol                  |    |
| 4           | 17.917              | 2.199         | Emylcamate                           |    |
| 5           | 22.575              | 9.346         | Palmitic Acid                        |   |
| 6           | 24.325              | 6.132         | Linoleic Acid                        |  |

**Table S4:** The main phenolic compounds identified in *C. aurantium* L. peel and in *C. aurantium* L var. *amara* reported in the literature.

| Species name                                                        | Fruit's origin | Extract      | Identified Phenolic components                                                                                                                                                                                                           | References |
|---------------------------------------------------------------------|----------------|--------------|------------------------------------------------------------------------------------------------------------------------------------------------------------------------------------------------------------------------------------------|------------|
| Bitter orange<br>( <i>Citrus aurantium</i> .<br>L)                  | USA            | 80% Ethanol  | Isonaringin, Naringin, Hesperidin, Neohesperidin, Naringenin, Hesperitin, Nobiletin and Tangeritin                                                                                                                                       | [33]       |
|                                                                     | Italy          | Methanol     | Caffeic, p-Coumaric, Ferulic, and Synapic acids, Naringin, Neohesperidin, Hesperidin, Narirutin, and Neohesperidin                                                                                                                       | [34]       |
|                                                                     | Iran           | Methanol     | Gallic, Caffeic, and Syringic acids, Pyrogallol, Naringin, Quercetin, and Rutin                                                                                                                                                          | [35]       |
|                                                                     | Tunisia        | Methanol     | Gallic, Chlorogenic, Rosmarinic, Trans-2-hydroxycinnamic, p-Coumaric, Ferulic acids, Epicatechin, Catechin, Naringin and Rutin                                                                                                           | [31]       |
|                                                                     | China          | 20% Ethanol  | Naringin, Hesperidin, Neohesperidin, Naringenin, Hesperitin, Narirutin, and Neohesperidin                                                                                                                                                | [32]       |
| Bitter orange<br>( <i>Citrus aurantium</i> L<br>var. <i>amara</i> ) | Italy          | 80% Ethanol  |                                                                                                                                                                                                                                          | [36]       |
|                                                                     | Cuba           | 70% Ethanol  | Apigenin-6,8-di-C-glucoside, Diosmetin-6,8-di-C-glucoside, Rhoifolin 4'-glucoside, Neohesperidin, Rhoifolin, Neodiosmin, Brutieridin, Nobiletin                                                                                          | [37]       |
|                                                                     | China          | 80% Methanol | Tangeretin, Auraptene, Nobiletin, Scopoletin, Hesperitin-O-rhamnoside, Diosmetin-O-glucoside, Apigenin, Hesperidin, Naringenin-O-glucoside, Naringenin, Asparagine, Luteolin-O-glucoside, Eriocitrin, Narirutin, Naringin, Neohesperidin | [38]       |
